# Supplementary material for: Voice onset time as a specific classifier for the PIGD subtype in Parkinson's Disease, independent of non-motor symptom severity
Source: Research Square preprint supplement (doi:10.21203/rs.3.rs-7979633/v1), 2025-11-26
Supplement: Supplementary file 1 [file 84ba46b226b36f1c44dae10e.docx]

**Supplementary Table S1 Comparison of speech parameters among male TD, PIGD, and HC groups**

| parameters | TD | PIGD | HC | *H*/*F* | *P-*value |
| --- | --- | --- | --- | --- | --- |
| jitter（%） |  |  |  |  |  |
| /e/ | 0.43（0.38） | 0.54（0.30）a | 0.41（0.20） | **7.620** | **0.022*** |
| /i/ | 0.50±0.18 | 0.54±0.18 | 0.43±0.10 | 1.972 | 0.149 |
| /u/ | 0.44（0.20） | 0.52（0.26） | 0.40（0.25） | 5.627 | 0.060 |
| F2（Hz） |  |  |  |  |  |
| /e/ | 1536.74（168.61） | 1576.08（172.38） | 1542.63（134.04） | 0.397 | 0.820 |
| /i/ | 2077.58（144.55） | 2054.59（211.83） | 2107.91（78.58） | 1.210 | 0.546 |
| /u/ | 1819.11（523.69） | 1845.77（437.99） | 1529.87（524.15） | 4.968 | 0.083 |
| Formant ratio |  |  |  |  |  |
| F2/i//F2/u/ | 1.17±0.19a | 1.19±0.21 | 1.33±0.21 | **3.414** | **0.040*** |
| FCR | 1.61（0.18） | 1.60（0.17） | 1.53（0.16） | 4.494 | 0.106 |
| VOT（ms） |  |  |  |  |  |
| /pa/ | 49.09 (26.70) | 56.92 (26.53) | 37.14 (28.72) | 3.122 | 0.210 |
| /ta/ | 41.83±17.82 | 50.52±25.03 | 41.79±21.95 | 1.097 | 0.341 |
| /ka/ | 57.86±20.65 | 65.76±23.36 | 61.46±19.93 | 0.757 | 0.474 |
| /pataka/ | 63.13±19.90 | 67.08±18.47 | 67.03±20.59 | 0.292 | 0.748 |
| Passage Reading |  |  |  |  |  |
| F0std（Hz） | 24.53±6.05 | 25.44±7.89 | 24.50±7.24 | 0.116 | 0.891 |
| Duration of pause（ms） | 0.52（0.14） | 0.60（0.19） | 0.51（0.10） | 2.322 | 0.313 |

TD, tremor-dominant type; PIGD, postural instability/gait difficulty type; jitter, fundamental frequency perturbation; F2, second formant frequency; VOT, voice onset time; FCR, formant centralization ratio. Data with normal distribution are expressed as mean ± standard deviation (x±s), while non-normally distributed data are expressed as median (interquartile range) [M (QU-QL)]. Compared with the control group, aP<0.05; compared with the TD group, bP<0.05. *: P<0.05; **: P<0.01; ***: P<0.001.

**Supplementary Table S2 Comparison of speech parameters among the female TD, PIGD, and HC groups**

| parameters | TD | PIGD | HC | *H*/*F* | *P-*value |
| --- | --- | --- | --- | --- | --- |
| jitter〔*M*（*Q*U－*Q*L），%〕 |  |  |  |  |  |
| /e/ | 0.46（0.26） | 0.76（0.51） | 0.48（0.19） | **6.163** | **0.046*** |
| /i/ | 0.42（0.19） | 0.53（0.50） | 0.38（0.22） | 4.810 | 0.090 |
| /u/ | 0.40（0.14） | 0.61（0.60） | 0.45（0.15） | 4.482 | 0.106 |
| F2〔*M*（*Q*U－*Q*L），Hz〕 |  |  |  |  |  |
| /e/ | 1607.11（71.18） | 1627.44（43.82） | 1648.63（107.68） | 1.537 | 0.464 |
| /i/ | 2220.93（151.97） | 2178.92（213.76） | 2201.95（300.73） | 1.555 | 0.459 |
| /u/ | 1630.12（351.03） | 1761.65（333.31） | 1422.59（334.74） | 3.807 | 0.149 |
| Formant ratio |  |  |  |  |  |
| F2/i//F2/u/（*x*±*s*） | 1.34±0.19 | 1.26±0.23 | 1.43±0.27 | 1.723 | 0.191 |
| FCR〔*M*（*Q*U－*Q*L）〕 | 1.47（0.06） | 1.61（0.20） | 1.45（0.27） | 4.701 | 0.095 |
| VOT（ms） |  |  |  |  |  |
| /pa/〔*M*（*Q*U－*Q*L）〕 | 30.67 (17.52) | 43.54 (28.35) | 26.67 (4.35) | 4.638 | 0.098 |
| /ta/〔*M*（*Q*U－*Q*L）〕 | 31.85 (26.91) | 48.28 (8.14)a | 27.11 (19.97) | **7.171** | **0.028*** |
| /ka/（*x*±*s*） | 50.50±21.83 | 64.87±26.77 | 44.38±17.86 | 2.964 | 0.063 |
| /pataka/（*x*±*s*） | 50.27±15.38 | 54.77±22.99 | 49.93±21.26 | 0.241 | 0.787 |
| Passage Reading |  |  |  |  |  |
| F0std（*x*±*s，*Hz） | 35.32±9.58 | 30.15±10.53 | 37.89±7.51 | 2.401 | 0.104 |
| Duration of pause〔*M*（*Q*U－*Q*L），ms〕 | 0.48 (0.05) | 0.52 (0.13) | 0.47 (0.12) | 0.967 | 0.617 |

TD, tremor-dominant type; PIGD, postural instability/gait difficulty type; jitter, fundamental frequency perturbation; F2, second formant frequency; VOT, voice onset time; FCR, formant centralization ratio. Data with normal distribution are expressed as mean ± standard deviation (x±s), while non-normally distributed data are expressed as median (interquartile range) [M (QU-QL)]. Compared with the control group, aP<0.05; compared with the TD group, bP<0.05. *: P<0.05; **: P<0.01; ***: P<0.001.
